# Supplementary material for: Formation of N-doped molybdenum carbide confined in hierarchical and hollow carbon nitride microspheres with enhanced sodium storage properties
Source: Royal Society of Chemistry journal article supplement (doi:10.1039/c6ta05025e), 2016-01-01
Supplement: c6ta05025e1.pdf [file c6ta05025e1.pdf]

## Supplementary Information

### **Formation of N-doped molybdenum carbide confined into hierarchical and hollow carbon nitride microspheres with enhanced sodium storage properties**

Jiyicheng Qiu<sup>a</sup>, Zhanxu Yang<sup>a\*</sup>, Qiang Li<sup>a</sup>, Yue Li<sup>b</sup>, Xian Wu<sup>a</sup>, Chengyuan Qi<sup>a</sup>, Qingdong Qiao<sup>a</sup>

<sup>a</sup> College of Chemistry, Chemical Engineering and Environment Engineering, Liaoning Shihua University, Fushun, Liaoning 113001, P. R. China.

<sup>b</sup> School of Foreign Languages, Liaoning Shihua University, Fushun, Liaoning 113001, P. R. China

\*Corresponding author: zhanxuy@126.com(Z. Yang).

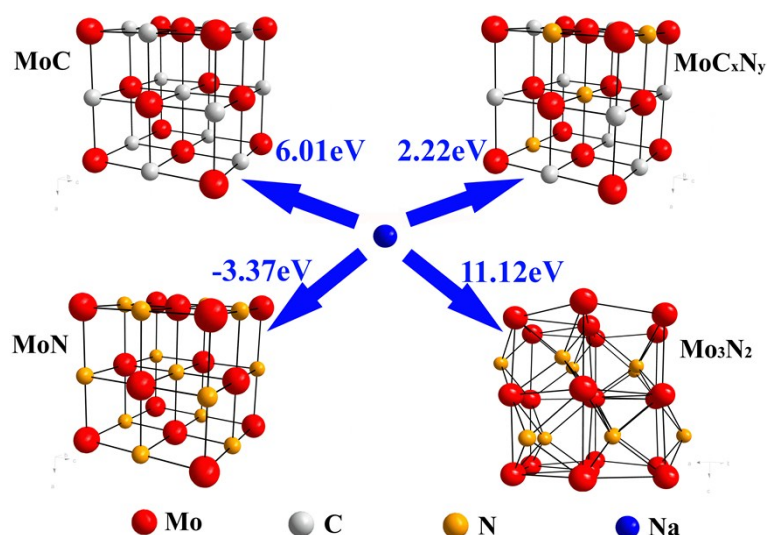

**Fig. S1** The first-principles calculation results of binding energy difference upon the sodium ion absorption into various molybdenum carbide or nitride.

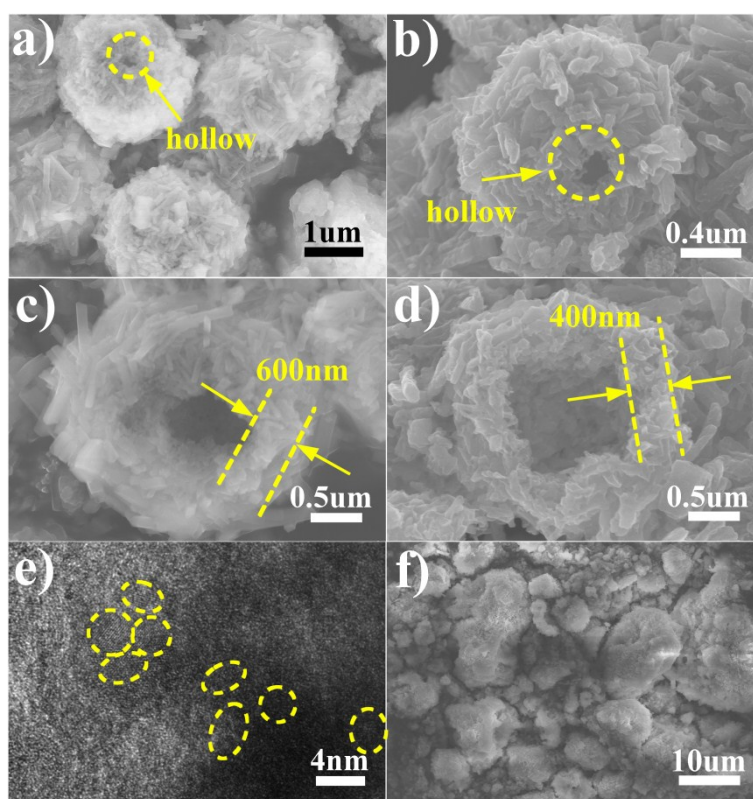

**Fig. S2** (a) SEM image of melamine-based supramolecular precursor show the hollow structure. (b) SEM image of PM-500 reveal that the annealed sample also maintain the hollow structure. (c) SEM image of broken melamine-based supramolecular microsphere. (d) SEM image of broken PM-500 microsphere. (e) TEM image of PM-500 sample show the uniform dispersion of  $\text{MoC}_x\text{N}_y$  nanoparticles. (f) SEM image of the melamine-based supramolecular samples without addition of L-glutamic acid

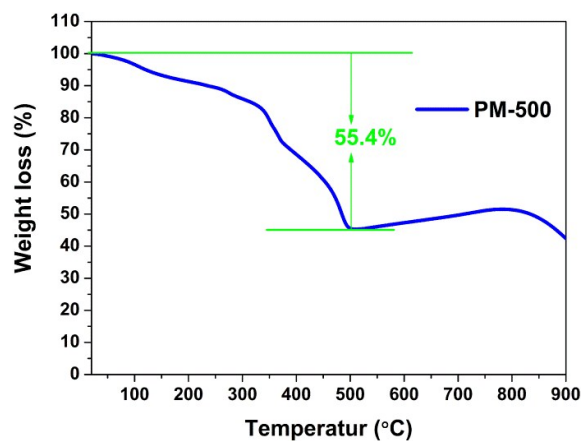

**Fig. S3** TG analysis for the calcination of melamine-based supramolecular precursor up to 900 °C in N<sub>2</sub> gas.

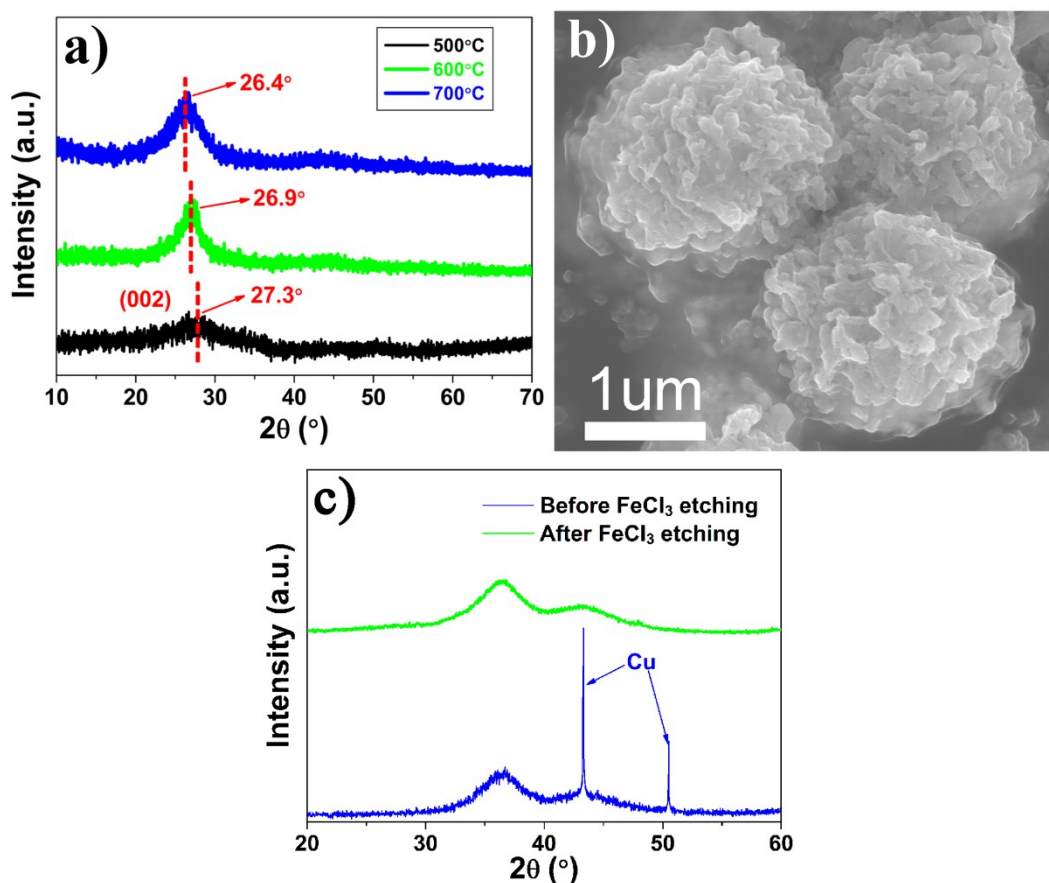

**Fig. S4** (a) XRD pattern and (b) SEM image of the as-obtained carbon nitride matrix. (c) XRD pattern of the calcined composites before and after FeCl<sub>3</sub> etching treatment.

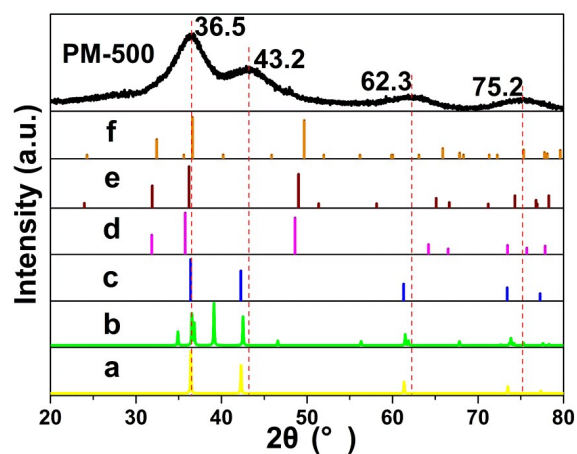

**Fig. S5** XRD pattern comparison for PM-500 with (a) MoC<sub>1-x</sub> (JCPDS 01-89-2868), (b) MoC<sub>1-x</sub> (JCPDS 01-089-4305), (c) MoC (JCPDS 65-0280), (d) MoC (JCPDS 65-6664), (e) MoN (JCPDS 25-1367) and (f) MoN (JCPDS 89-2904).

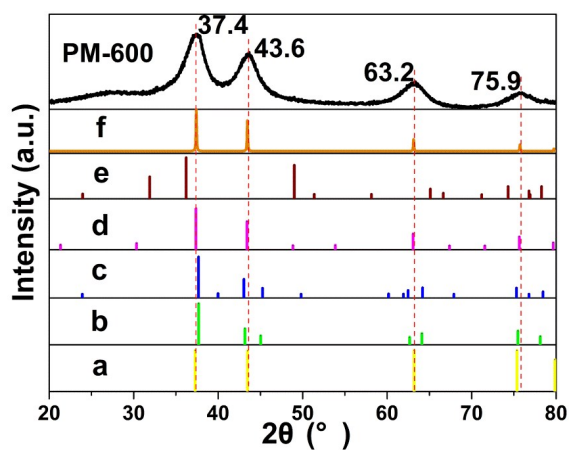

**Fig. S6** XRD pattern comparison for PM-600 with (a) Mo<sub>2</sub>N (JCPDS 03-0907), (b) Mo<sub>2</sub>N (JCPDS 25-1368), (c) Mo<sub>2</sub>N (JCPDS 65-6236), (d) Mo<sub>3</sub>N<sub>2</sub> (JCPDS 65-4278), (e) MoN (JCPDS 25-1367) and (f) Mo<sub>2</sub>N (JCPDS 25-1366)

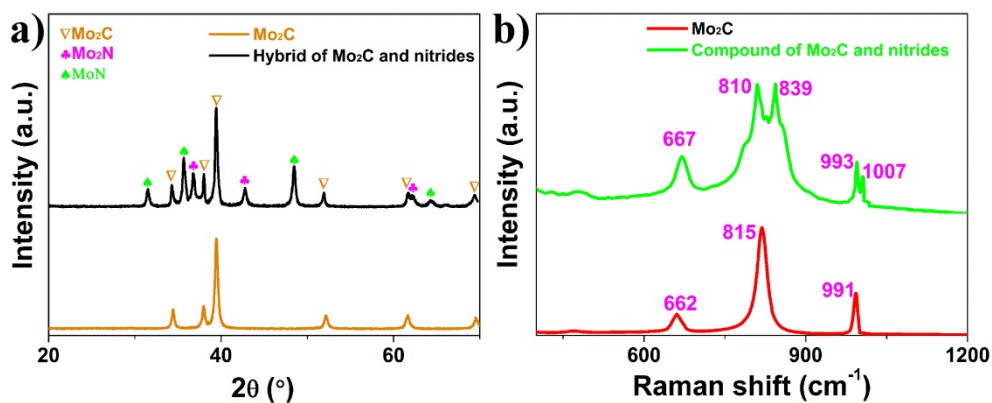

**Fig. S7** (a) The XRD pattern of pure Mo<sub>2</sub>C and the mixture compound of pure Mo<sub>2</sub>C, MoN and Mo<sub>2</sub>N. (b) the Raman spectra of pure Mo<sub>2</sub>C and the mixture compound of pure Mo<sub>2</sub>C, MoN and Mo<sub>2</sub>N.

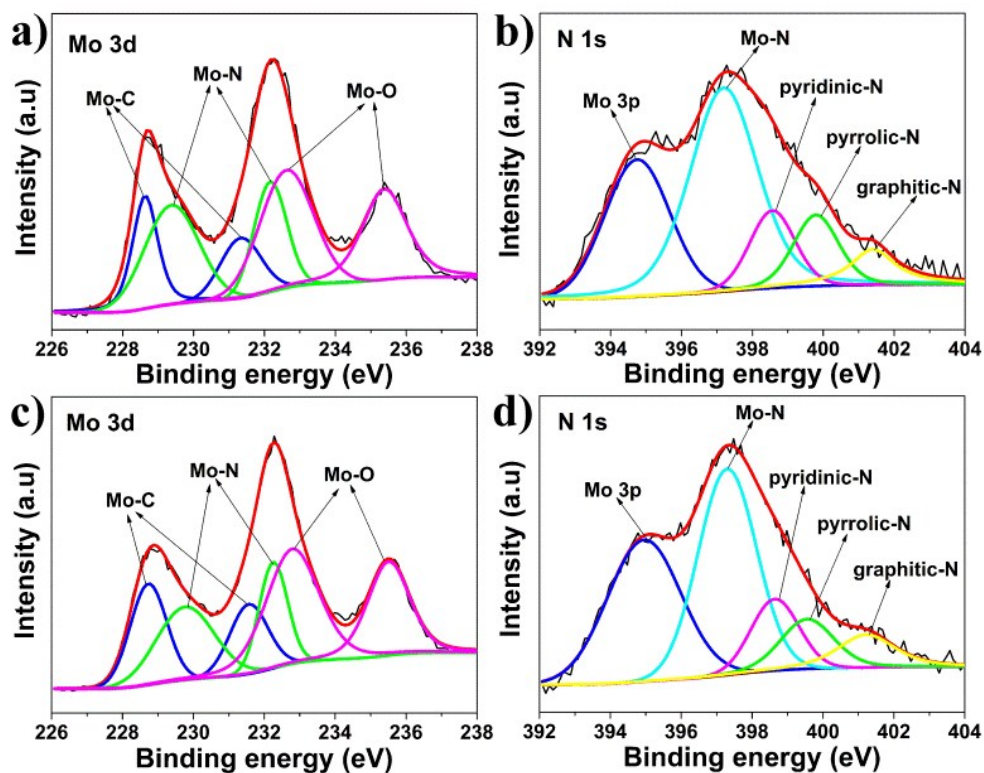

**Fig. S8** XPS spectra of PM-500 for (a) Mo3d and (b) N1s. XPS spectra of PM-700 for (c) Mo3d and (d) N1s.

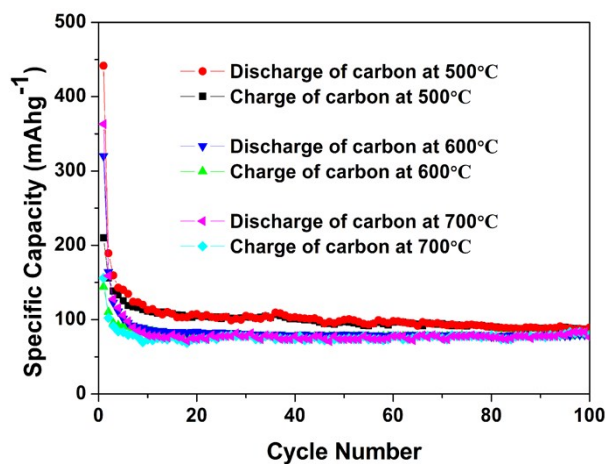

**Fig. S9** Cyclability tests on the as-obtained carbonaceous materials calcined at 500, 600 and 700 °C at a current density of  $0.16 \text{ A g}^{-1}$  for 100 cycles.

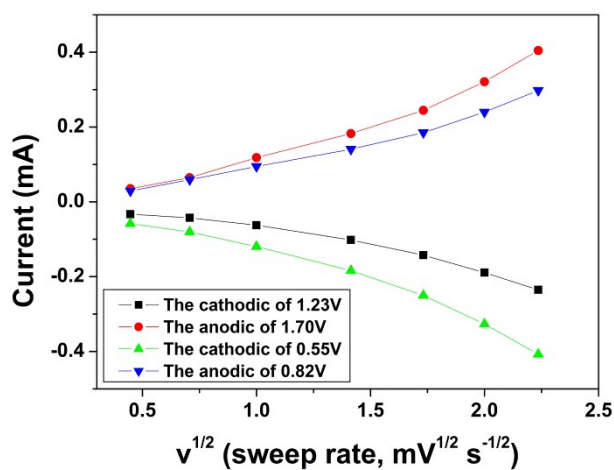

**Fig. S10** The Relationship between the peak current and the square root of sweep rates



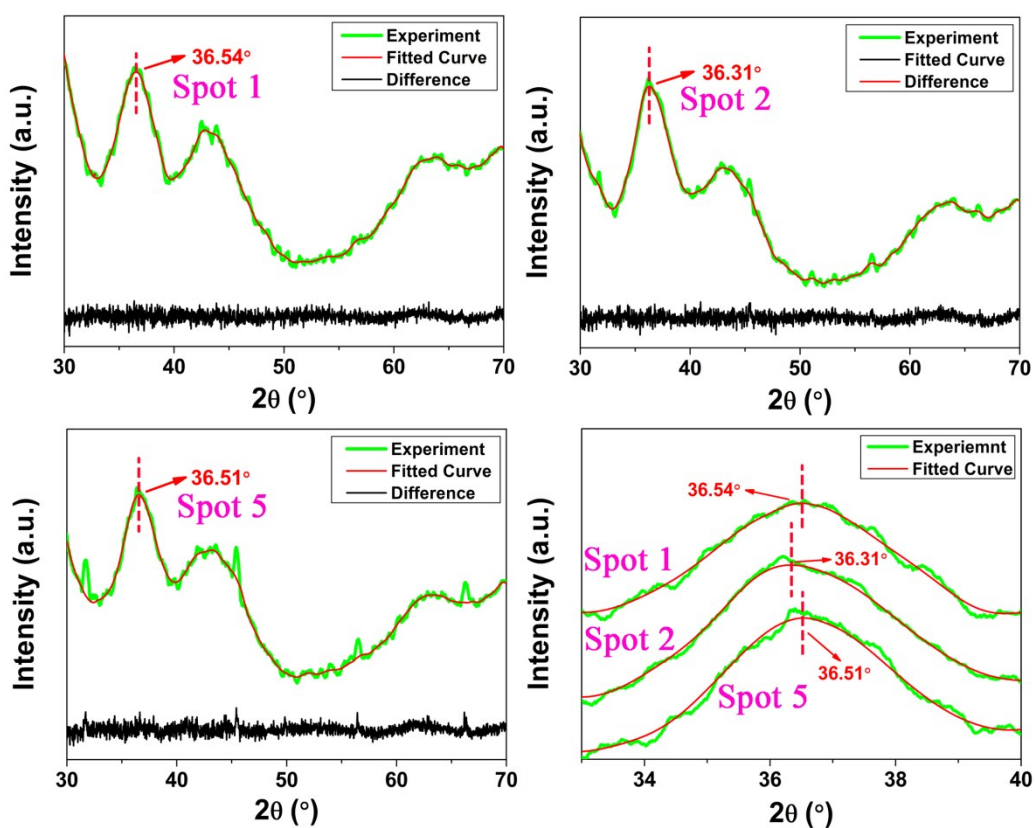

**Fig. S11** The fitted XRD pattern of the PM-500 electrode (a) without cycling (spot 1), (b) at the discharge potential 0.9 V (spot 2) and (c) charge potential 3 V (spot 5) by TOPAS software. (d) The  $2\theta$  region  $33\sim 40^\circ$  magnification for the fitted XRD pattern of the electrode at the above three step. (spot 3: discharge to 0.01 V; spot 4: charge to 1.4 V)

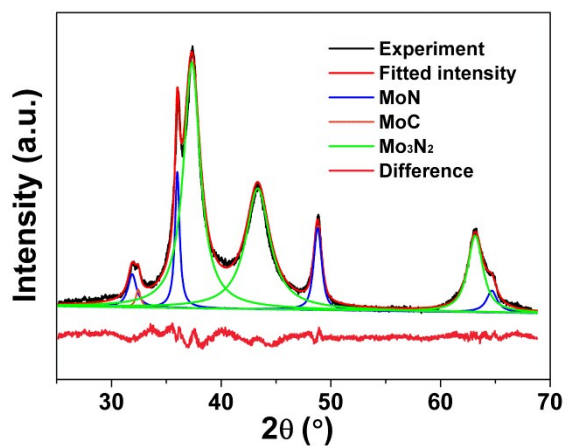

**Fig. S12** The TOPAS analysis on XRD pattern of the PM-700 composites.

**Table S1** Characteristics of the deconvoluted Mo3d spectra for various composites

| Sample | Peak Position (eV) |               |               | Species Percentage (%) |       |       |
|--------|--------------------|---------------|---------------|------------------------|-------|-------|
|        | Mo-C               | Mo-N          | Mo-O          | Mo-C                   | Mo-N  | Mo-O  |
| PM-500 | 228.4 ; 230.9      | 229.1 ; 231.9 | 232.6 ; 235.5 | 22.62                  | 33.72 | 41.66 |
| PM-600 | 228.6 ; 231.3      | 229.4 ; 232.2 | 232.6 ; 235.4 | 18.48                  | 37.61 | 43.91 |
| PM-700 | 228.8 ; 231.6      | 229.8 ; 232.4 | 232.7 ; 235.5 | 11.27                  | 45.94 | 42.79 |

**Table S2** Characteristics of the deconvoluted N1s spectra for various composites

| Species     | Peak Position (eV) |        |        | Species Percentage (%) |        |        |
|-------------|--------------------|--------|--------|------------------------|--------|--------|
|             | PM-500             | PM-600 | PM-700 | PM-500                 | PM-600 | PM-700 |
| Mo-N        | 397.1              | 397.2  | 397.3  | 55.87                  | 57.7   | 58.13  |
| pyridinic-N | 398.2              | 398.6  | 398.6  | 17.03                  | 18.62  | 16.51  |
| pyrrolic-N  | 399.5              | 399.8  | 399.6  | 15.66                  | 14.22  | 14.01  |
| graphitic-N | 400.9              | 401.3  | 401.2  | 11.44                  | 9.46   | 11.35  |

**Table S3** Refined parameters of molybdenum carbonitride at various potential steps and the cell parameters of Pristine  $\alpha$ -MoC<sub>1-x</sub> (JCPDS 01-89-2868)

| Samples                                                     | Refined lattice parameters         |
|-------------------------------------------------------------|------------------------------------|
| MoC <sub>x</sub> N <sub>y</sub> with no cycling (Spot 1)    | $a=b=c=4.137\pm 0.003 \text{ \AA}$ |
| MoC <sub>x</sub> N <sub>y</sub> discharged to 0.9V (Spot 2) | $a=b=c=4.172\pm 0.004 \text{ \AA}$ |
| MoC <sub>x</sub> N <sub>y</sub> charged to 3V (Spot 5)      | $a=b=c=4.151\pm 0.002 \text{ \AA}$ |
| Pristine $\alpha$ -MoC <sub>1-x</sub>                       | $a=b=c=4.270 \text{ \AA}$          |



**Table S4** Comparison for electrochemical properties of various anode materials for sodium ion batteries

| Materials                                                           | Current rate<br>(mA g <sup>-1</sup> ) | Specific capacity<br>(mAh g <sup>-1</sup> ) | Ref  |
|---------------------------------------------------------------------|---------------------------------------|---------------------------------------------|------|
| MgFe <sub>2</sub> O <sub>4</sub> /reduced                           | 100                                   | 306                                         | 1    |
| graphene oxide                                                      | 500                                   | 197.6                                       |      |
| TiO <sub>2</sub> /C                                                 | 100                                   | 221                                         | 2    |
|                                                                     | 500                                   | 173                                         |      |
| Cu-doped<br>Li <sub>4</sub> Ti <sub>5</sub> O <sub>12</sub> /carbon | 100                                   | 123                                         | 3    |
|                                                                     | 400                                   | 79                                          |      |
| SnO <sub>2</sub> /carbon fiber                                      | 100                                   | 359                                         | 4    |
|                                                                     | 400                                   | 251                                         |      |
| FePO <sub>4</sub> @MCNT nanowire                                    | 0.3 C                                 | 133.2                                       | 5    |
|                                                                     | 0.5C                                  | 122.2                                       |      |
| Sn <sub>3</sub> N <sub>4</sub> nanocrystal                          | 200                                   | 164                                         | 6    |
|                                                                     | 400                                   | 127                                         |      |
| carbon-coated TiO <sub>2</sub>                                      | 100                                   | 183                                         | 7    |
|                                                                     | 400                                   | 149                                         |      |
| MoS <sub>2</sub> nanosheets                                         | 160                                   | 305                                         | 8    |
|                                                                     | 320                                   | 251                                         |      |
| MoC <sub>x</sub> N <sub>y</sub> /carbon nitride                     | 160                                   | 410                                         | Our  |
| hollow microsphere                                                  | 500                                   | 310                                         | work |

## References

- 1 X Zhang, T Chen, D Yan, W Qin, B Hu, Z Sun and L Pan, MgFe<sub>2</sub>O<sub>4</sub>/reduced graphene oxide composites as high-performance anode materials for sodium ion batteries, *Electrochim. Acta.*, 2015, **180**, 616-621.
- 2 C. Ding, T. Nohira and R. Hagiwara, A high-capacity TiO<sub>2</sub>/C negative electrode for sodium secondary batteries with an ionic liquid electrolyte, *J. Mater. Chem. A*, 2015, **3**, 20767-20771.
- 3 Y. Ge, H. Jiang, K. Fu, C. Zhang, J. Zhu, C. Chen, Y. Lu, Y. Qiu and X. Zhang, Copper-doped Li<sub>4</sub>Ti<sub>5</sub>O<sub>12</sub>/carbon nanofiber composites as anode for high-performance sodium-ion batteries, *J. Power Sources*, 2014, **272**, 860-865.
- 4 M. Dirican, Y. Lu, Y. Ge, O. Yildiz and X. Zhang, Carbon-Confined SnO<sub>2</sub>-Electrodeposited Porous Carbon Nanofiber Composite as High-Capacity Sodium-Ion Battery Anode Material, *ACS Appl. Mater. Interfaces*, 2015, **7**, 18387-18396.
- 5 S. Xu, S. Zhang, J. Zhang, T. Tan and Y. Liu, A maize-like FePO<sub>4</sub>@MCNT nanowire composite for sodium-ion batteries via a microemulsion technique, *J. Mater. Chem. A*, 2014, **2**, 7221-7228.
- 6 X. Li, A. L. Hector, J. R. Owen and S. I. U. Shah, Evaluation of nanocrystalline Sn<sub>3</sub>N<sub>4</sub> derived from ammonolysis of Sn(NEt<sub>2</sub>)<sub>4</sub> as a negative electrode material for Li-ion and Na-ion batteries, *J. Mater. Chem. A*, 2016, **4**, 5081-5087.

- 7 Y. Ge, H. Jiang, J. Zhu, Y. Lu, C. Chen, Y. Hu, Y. Qiu and X. Zhang, High cyclability of carbon-coated TiO<sub>2</sub> nanoparticles as anode for sodium-ion batteries, *Electrochim. Acta.*, 2015, **157**, 142-148.
- 8 D. Su, S. Dou and G. Wang, Ultrathin MoS<sub>2</sub> Nanosheets as Anode Materials for Sodium-Ion Batteries with Superior Performance, *Adv. Energy Mater.*, 2015, **5**, 1401205.
